# Supplementary material
Source: PubMed Central journal article supplement (PMC6583087)

## Supplementary Online Content

Essien UR, Holmes DN, Jackson LR, et al. Association of race/ethnicity with oral anticoagulant use in patients with atrial fibrillation in the Outcomes Registry for Better Informed Treatment of Atrial Fibrillation II (ORBIT-AF II). *JAMA Cardiol*. Published online November 28, 2018. doi:10.1001/jamacardio.2018.3945

**eTable 1.** Association between race/ethnicity and any OAC use at baseline, including demographic and clinical features, enrolling physician specialty, and socioeconomic markers.

**eTable 2.** Association between race/ethnicity and DOAC use at baseline among patients on an OAC, including demographic and clinical features, enrolling physician specialty, and socioeconomic markers.

**eTable 3.** Association between race/ethnicity and any OAC use, restricted to patients newly diagnosed with atrial fibrillation

**eTable 4.** Association between race/ethnicity and DOAC use among patients on an OAC, restricted to patients newly diagnosed with atrial fibrillation

**eFigure.** Kaplan-Meier plot representing the time to discontinuation of any oral anticoagulant by race/ethnicity over one year.

This supplementary material has been provided by the authors to give readers additional information about their work.

**eTable 1.** Association between race/ethnicity and any OAC use at baseline, including demographic and clinical features, enrolling physician specialty, and socioeconomic markers.

| Variable                                              | OR (95% CI)       | P-value | Global P-value |
|-------------------------------------------------------|-------------------|---------|----------------|
| <b>Race/Ethnicity</b>                                 |                   | .       | 0.24           |
| White                                                 | Reference         | .       | .              |
| Black                                                 | 0.78 (0.59-1.04)  | 0.09    | .              |
| Hispanic                                              | 0.98 (0.71-1.36)  | 0.92    | .              |
| <b>Age</b>                                            |                   | .       | <.0001         |
| Age (per 1 year increase & ≤ 75)                      | 1.05 (1.04-1.06)  | <.0001  | .              |
| Age (per 1 year increase & > 75)                      | 0.96 (0.94-0.97)  | <.0001  | .              |
| Female sex                                            | 0.83 (0.72-0.96)  | 0.01    | .              |
| Hx of bleeding                                        | 0.34 (0.26-0.44)  | <.0001  | .              |
| Hypertension                                          | 1.99 (1.70-2.33)  | <.0001  | .              |
| Reduced hemoglobin/Hct/anemia                         | 0.71 (0.61-0.83)  | <.0001  | .              |
| Hx of stroke/TIA                                      | 2.52 (1.91-3.32)  | <.0001  | .              |
| Diabetes                                              | 1.39 (1.18-1.63)  | <.0001  | .              |
| CHF/LV dysfunction                                    | 1.68 (1.41-2.00)  | <.0001  | .              |
| Hx of vascular disease                                | 1.75 (1.49-2.06)  | <.0001  | .              |
| eGFR < 60 mg/dL                                       | 1.11 (0.94-1.32)  | 0.21    | .              |
| Current antiplatelet use                              | 0.10 (0.08-0.11)  | <.0001  | .              |
| <b>AF Type</b>                                        |                   | .       | <.0001         |
| New onset AF                                          | Reference         | .       | .              |
| Paroxysmal AF                                         | 1.91 (1.63-2.24)  | <.0001  | .              |
| Persistent AF                                         | 5.72 (4.12-7.94)  | <.0001  | .              |
| Permanent AF                                          | 7.03 (3.57-13.82) | <.0001  | .              |
| <b>Enrolling Physician</b>                            |                   | .       | <.0001         |
| Cardiology                                            | Reference         | .       | .              |
| Internal Medicine or Neurology                        | 0.55 (0.40-0.75)  | 0.0002  | .              |
| Electrophysiology                                     | 1.39 (1.11-1.75)  | 0.0043  | .              |
| <b>Insurance</b>                                      |                   | .       | 0.72           |
| Private health insurance                              | Reference         | .       | .              |
| Medicaid                                              | 0.84 (0.61-1.17)  | 0.30    | .              |
| Medicare                                              | 0.97 (0.82-1.14)  | 0.70    | .              |
| Other or none                                         | 0.90 (0.67-1.23)  | 0.52    | .              |
| <b>Level of Education</b>                             |                   | .       | 0.21           |
| Some school                                           | Reference         | .       | .              |
| High school graduate                                  | 1.27 (0.99-1.63)  | 0.056   | .              |
| College graduate                                      | 1.33 (1.01-1.74)  | 0.04    | .              |
| Post graduate                                         | 1.26 (0.90-1.78)  | 0.18    | .              |
| <b>Median Household Income (per \$5,000 increase)</b> | 1.00 (0.98-1.02)  | 0.94    | .              |

| <b>Variable</b> | <b>OR (95% CI)</b> | <b>P-value</b> | <b>Global P-value</b> |
|-----------------|--------------------|----------------|-----------------------|
| <b>Region</b>   |                    | .              | 0.45                  |
| South           | Reference          | .              | .                     |
| West            | 0.80 (0.52-1.24)   | 0.33           | .                     |
| Northeast       | 1.20 (0.78-1.85)   | 0.40           | .                     |
| Midwest         | 1.08 (0.72-1.61)   | 0.72           | .                     |

OAC indicates oral anticoagulant; OR, odds ratio; Hct, hematocrit; TIA, transient ischemic attack; CHF, congestive heart failure; eGFR, estimated glomerular filtration rate.

**eTable 2.** Association between race/ethnicity and DOAC use at baseline among patients on an OAC, including demographic and clinical features, enrolling physician specialty, and socioeconomic markers.

| <b>Variable</b>                                       | <b>OR (95% CI)</b> | <b>P-value</b> | <b>Global P-value</b> |
|-------------------------------------------------------|--------------------|----------------|-----------------------|
| <b>Race/Ethnicity</b>                                 |                    | .              | 0.0487                |
| White                                                 | Reference          | .              | .                     |
| Black                                                 | 0.73 (0.55-0.95)   | 0.02           | .                     |
| Hispanic                                              | 1.10 (0.81-1.49)   | 0.54           | .                     |
| Age (per 1 yr increase)                               | 0.99 (0.99-1.00)   | 0.037          | .                     |
| Female sex                                            | 1.05 (0.92-1.20)   | 0.47           | .                     |
| Hx of bleeding                                        | 0.80 (0.61-1.06)   | 0.12           | .                     |
| Hypertension                                          | 0.97 (0.82-1.15)   | 0.74           | .                     |
| Reduced hemoglobin/Hct/anemia                         | 0.67 (0.59-0.77)   | <.0001         | .                     |
| Hx of stroke/TIA                                      | 0.72 (0.60-0.87)   | 0.0005         | .                     |
| Diabetes                                              | 0.87 (0.76-0.99)   | 0.04           | .                     |
| CHF/LV dysfunction                                    | 0.77 (0.67-0.88)   | 0.0002         | .                     |
| Hx of vascular disease                                | 1.00 (0.87-1.16)   | 0.99           | .                     |
| eGFR < 60 mg/dL                                       | 0.79 (0.69-0.91)   | 0.001          | .                     |
| Current antiplatelet use                              | 0.74 (0.65-0.86)   | <.0001         | .                     |
| <b>AF Type</b>                                        |                    | .              | <.0001                |
| New onset AF                                          | Reference          | .              | .                     |
| Paroxysmal AF                                         | 3.50 (2.97-4.12)   | <.0001         | .                     |
| Persistent AF                                         | 2.75 (2.22-3.41)   | <.0001         | .                     |
| Permanent AF                                          | 9.79 (5.86-16.36)  | <.0001         | .                     |
| <b>Enrolling Physician</b>                            |                    | .              | <.0001                |
| Cardiology                                            | Reference          | .              | .                     |
| Internal Medicine or Neurology                        | 0.40 (0.29-0.53)   | <.0001         | .                     |
| Electrophysiology                                     | 1.16 (0.95-1.42)   | 0.15           | .                     |
| <b>Insurance</b>                                      |                    | .              | 0.0006                |
| Private health insurance                              | Reference          | .              | .                     |
| Medicaid                                              | 0.64 (0.47-0.87)   | 0.0050         | .                     |
| Medicare                                              | 0.81 (0.70-0.94)   | 0.0054         | .                     |
| Other or none                                         | 0.66 (0.49-0.88)   | 0.0047         | .                     |
| <b>Level of Education</b>                             |                    | .              | <.0001                |
| Some school                                           | Reference          | .              | .                     |
| High school graduate                                  | 1.24 (1.00-1.55)   | 0.05           | .                     |
| College graduate                                      | 1.61 (1.24-2.09)   | 0.0003         | .                     |
| Post graduate                                         | 2.14 (1.53-3.00)   | <.0001         | .                     |
| <b>Median household income (per \$5,000 increase)</b> | 1.01 (1.00-1.03)   | 0.096          | .                     |

| <b>Variable</b> | <b>OR (95% CI)</b> | <b>P-value</b> | <b>Global P-value</b> |
|-----------------|--------------------|----------------|-----------------------|
| <b>Region</b>   |                    | .              | 0.08                  |
| South           | Reference          | .              | .                     |
| West            | 0.98 (0.60-1.60)   | 0.94           | .                     |
| Northeast       | 0.72 (0.45-1.16)   | 0.18           | .                     |
| Midwest         | 0.58 (0.37-0.91)   | 0.019          | .                     |

DOAC indicates direct-acting oral anticoagulant; OAC, oral anticoagulant; OR, odds ratio; Hct, hematocrit; TIA, transient ischemic attack; CHF, congestive heart failure; eGFR, estimated glomerular filtration rate.

**eTable 3.** Association between race/ethnicity and any OAC use, restricted to patients newly diagnosed with atrial fibrillation

|                       |      | Unadjusted       |         | Adjusted for Baseline Clinical Features* |         | Adjusted for Additional Baseline Socioeconomic Markers† |         |
|-----------------------|------|------------------|---------|------------------------------------------|---------|---------------------------------------------------------|---------|
|                       |      | OR (95%CI)       | P-value | OR (95% CI)                              | P-value | OR (95% CI)                                             | P-value |
| <b>Race/Ethnicity</b> |      |                  |         |                                          |         |                                                         |         |
| White (n = 8175)      | 85.0 | Reference        | -       | Reference                                | -       | Reference                                               | -       |
| Black (n = 498)       | 79.5 | 0.73 (0.57-0.93) | 0.01    | 0.77 (0.57-1.02)                         | 0.07    | 0.80 (0.60-1.08)                                        | 0.14    |
| Hispanic (n = 493)    | 83.0 | 0.87 (0.66-1.15) | 0.32    | 0.88 (0.64-1.21)                         | 0.43    | 0.96 (0.69-1.34)                                        | 0.83    |

OAC indicates oral anticoagulant; OR, odds ratio.

\*Baseline clinical features include: demographics, medical history, medications, laboratory data, AF status and enrolling physician specialty.

†Baseline socioeconomic markers include median household income, level education, insurance type, and geographic region.

**eTable 4.** Association between race/ethnicity and DOAC use among patients on an OAC, restricted to patients newly diagnosed with atrial fibrillation

|                       |            | Unadjusted          |         | Adjusted for Baseline Clinical Features* |         | Adjusted for Additional Baseline Socioeconomic Markers† |         |
|-----------------------|------------|---------------------|---------|------------------------------------------|---------|---------------------------------------------------------|---------|
|                       | % NOAC use | OR (95% CI)         | P-value | OR (95% CI)                              | P-value | OR (95% CI)                                             | P-value |
| <b>Race/Ethnicity</b> |            |                     |         |                                          |         |                                                         |         |
| White (n = 6945)      | 79.0       | Reference           | -       | Reference                                | -       | Reference                                               | -       |
| Black (n = 396)       | 69.7       | 0.60<br>(0.46-0.78) | 0.0002  | 0.64<br>(0.48-0.84)                      | 0.001   | 0.73<br>(0.55-0.97)                                     | 0.03    |
| Hispanic (n = 409)    | 70.9       | 0.89<br>(0.67-1.19) | 0.45    | 0.98<br>(0.73-1.33)                      | 0.91    | 1.19<br>(0.87-1.63)                                     | 0.27    |

DOAC indicates direct-acting oral anticoagulant, OAC, oral anticoagulant, OR, odds ratio.

\*Baseline clinical features include: demographics, medical history, medications, laboratory data, AF status and enrolling physician specialty.

†Baseline socioeconomic markers include median household income, level education, insurance type, and geographic region.

**eFigure:** Kaplan-Meier plot representing the time to discontinuation of any oral anticoagulant by race/ethnicity over one year.

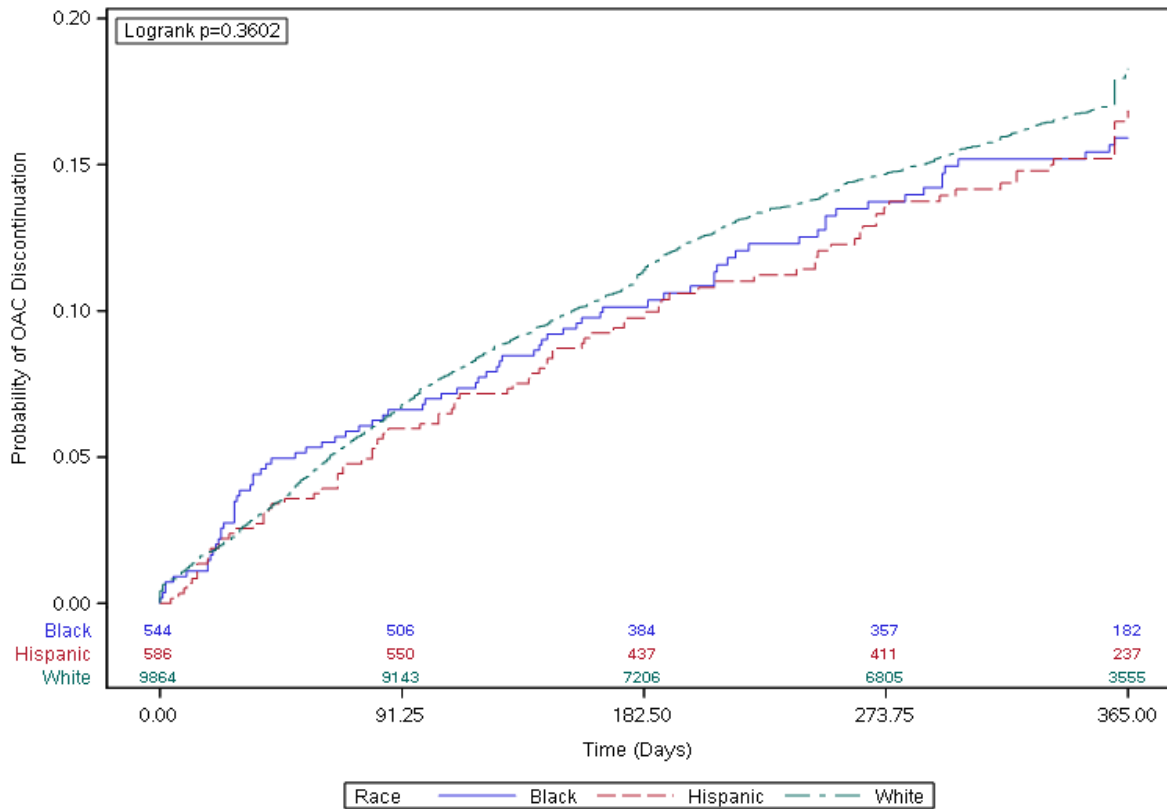

Supplement: jamacardiol-3-1174-s001.pdf [file jamacardiol-3-1174-s001.pdf]
